# Supplementary material for: Physical Wellness Among Gaming Adults: Cross-Sectional Study
Source: PubMed Central journal article supplement (PMC6019842; doi:10.2196/games.9571), 2018-06-12
Supplement: games_v6i2e12_app1.pdf [file games_v6i2e12_app1.pdf]

Baseline characteristics<sup>a</sup> of the study population (n=292).

| Characteristic                       | Mean (SD) or N (%)            |             |
|--------------------------------------|-------------------------------|-------------|
| <b>Age, years</b>                    | 34.2 (10.6)                   |             |
| <b>Race/Ethnicity</b>                |                               |             |
|                                      | White                         | 259 (89.3%) |
|                                      | African American              | 10 (3.5%)   |
|                                      | Other                         | 21 (7.2%)   |
| <b>Gender</b>                        |                               |             |
|                                      | Male                          | 197 (68.6%) |
|                                      | Female                        | 90 (31.4%)  |
| <b>Education Level</b>               |                               |             |
|                                      | High School or Less           | 27 (9.3%)   |
|                                      | Some College or 4-year Degree | 208 (71.2%) |
|                                      | Graduate Degree               | 57 (19.5%)  |
| <b>Income, per year</b>              |                               |             |
|                                      | <\$75,000                     | 147 (57.7%) |
|                                      | ≥\$75,000                     | 108 (42.4%) |
| <b>Employed</b>                      |                               |             |
|                                      | Yes                           | 219 (75.0%) |
|                                      | No                            | 73 (25.0%)  |
| <b>BMI, kg/m<sup>2</sup></b>         |                               | 31.2 (8.8)  |
| <b>BMI Category</b>                  |                               |             |
|                                      | <25 kg/m <sup>2</sup>         | 77 (26.4%)  |
|                                      | 25-29.9 kg/m <sup>2</sup>     | 77 (26.4%)  |
|                                      | ≥30 kg/m <sup>2</sup>         | 138 (47.3%) |
| <b>MVPA, hours/week</b>              |                               | 5.1 (5.9)   |
| <b>≥2.5 MVPA, hours/week</b>         |                               |             |
|                                      | Yes                           | 166 (56.9%) |
|                                      | No                            | 126 (43.2%) |
| <b>Total Sitting Time, hours/day</b> |                               |             |
|                                      | Weekday                       | 9.1 (4.5)   |
|                                      | Weekend                       | 7.9 (4.0)   |
| <b>Time Spent Gaming</b>             |                               |             |
|                                      | Total, hours/week             | 12.6 (10.9) |
|                                      | Weekday, hours/day            | 1.7 (1.6)   |
|                                      | Weekend, hours/day            | 2.1 (1.8)   |

|                                                                  |                         |             |
|------------------------------------------------------------------|-------------------------|-------------|
| <b>Number of Platforms Used</b>                                  |                         |             |
|                                                                  | 1                       | 22 (7.5%)   |
|                                                                  | 2                       | 74 (25.3%)  |
|                                                                  | 3                       | 121 (41.4%) |
|                                                                  | 4+                      | 75 (25.7%)  |
| <b>Platform Preference</b>                                       |                         |             |
|                                                                  | Tabletop Gaming         | 116 (39.7%) |
|                                                                  | Computer Gaming         | 103 (35.3%) |
|                                                                  | Console Gaming          | 41 (14.0%)  |
|                                                                  | Other Electronic Gaming | 25 (8.6%)   |
|                                                                  | LARP                    | 7 (2.4%)    |
| <b>Proportion of Time Spent Sitting While Gaming</b>             |                         |             |
|                                                                  | Half or Less            | 45 (15.6%)  |
|                                                                  | Most or All             | 243 (84.4%) |
| <b>Takes Breaks While Gaming</b>                                 |                         |             |
|                                                                  | Yes                     | 227 (82.6%) |
|                                                                  | No                      | 48 (17.4%)  |
| <b>Frequency of Breaks</b>                                       |                         |             |
|                                                                  | Every ≤55 minute        | 147 (64.8%) |
|                                                                  | 1 hour +                | 80 (35.2%)  |
| <b>Disability/Health Condition That Limits Physical Activity</b> |                         |             |
|                                                                  | Yes                     | 66 (22.8%)  |
|                                                                  | No                      | 224 (77.2%) |
| <b>Cardiovascular Disease</b>                                    |                         |             |
|                                                                  | Yes                     | 2 (0.7%)    |
|                                                                  | No                      | 279 (99.3%) |
| <b>Cardiovascular Risk Factors</b>                               |                         |             |
|                                                                  | Yes                     | 67 (23.1%)  |
|                                                                  | No                      | 223 (76.9%) |
| <b>Servings of Fruit per Day</b>                                 |                         | 1.04 (0.96) |
| <b>Servings of Vegetables per Day</b>                            |                         | 1.83 (1.21) |

<sup>a</sup>Means (SD) for continuous variables and frequencies (%) for categorical variables.  
 BMI-Body Mass Index  
 MVPA-Moderate to Vigorous Physical Activity
