# Supplementary material for: Physical Wellness Among Gaming Adults: Cross-Sectional Study
Source: PubMed Central journal article supplement (PMC6019842; doi:10.2196/games.9571), 2018-06-12
Supplement: games_v6i2e12_app2.pdf [file games_v6i2e12_app2.pdf]

Means (SD) and N (%) of characteristics by the number of platforms played.

|                                                      | 1 (22)      | 2 (74)      | 3 (121)     | 4+ (75)     | <i>P</i> |
|------------------------------------------------------|-------------|-------------|-------------|-------------|----------|
| <b>Age, years</b>                                    |             |             |             |             |          |
|                                                      | 37.4 (13.4) | 37.1 (11.6) | 33.6 (9.9)  | 31.3 (9.1)  | .01      |
| <b>BMI, kg/m<sup>2</sup></b>                         |             |             |             |             |          |
|                                                      | 28.7 (8.3)  | 31.4 (9.3)  | 31.2 (8.8)  | 31.8 (8.5)  | .45      |
| <b>Obese</b>                                         |             |             |             |             |          |
|                                                      | 8 (36.4%)   | 32 (43.2%)  | 57 (47.1%)  | 41 (54.7%)  | .36      |
| <b>MVPA, hours/week</b>                              |             |             |             |             |          |
|                                                      | 5.5 (5.5)   | 5.0 (5.6)   | 5.7 (6.5)   | 4.4 (5.4)   | .50      |
| <b>≥2.5 MVPA, hours/week</b>                         |             |             |             |             |          |
|                                                      | 14 (63.6%)  | 40 (54.1%)  | 73 (60.3%)  | 38 (52.0%)  | .58      |
| <b>Sitting Time, hours/day</b>                       |             |             |             |             |          |
| Weekday                                              | 9.4 (6.5)   | 9.1 (4.6)   | 9.0 (4.1)   | 9.3 (4.5)   | .91      |
| Weekend                                              | 7.6 (5.9)   | 7.1 (3.9)   | 8.1 (3.6)   | 8.7 (4.0)   | .05      |
| <b>Time Spent Gaming, hours/day</b>                  |             |             |             |             |          |
| Weekday                                              | 1.3 (1.7)   | 1.5 (1.6)   | 1.7 (1.6)   | 2.0 (1.6)   | .02      |
| Weekend                                              | 1.5 (1.7)   | 1.8 (1.8)   | 2.1 (1.7)   | 2.6 (1.7)   | .002     |
| <b>Cardiovascular Risk Factors</b>                   |             |             |             |             |          |
| Yes                                                  | 4 (18.2%)   | 20 (27.4%)  | 26 (21.7%)  | 17 (22.7%)  | .77      |
| No                                                   | 18 (81.8%)  | 53 (72.6%)  | 94 (78.3%)  | 58 (77.3%)  |          |
| <b>Proportion of Time Spent Sitting While Gaming</b> |             |             |             |             |          |
| Half or Less                                         | 7 (31.82%)  | 14 (19.2%)  | 13 (11.0%)  | 11 (14.7%)  | .07      |
| Most or All                                          | 15 (68.2%)  | 59 (80.8%)  | 105 (89.0%) | 64 (85.3%)  |          |
| <b>Take Breaks While Gaming</b>                      |             |             |             |             |          |
| Yes                                                  | 15 (79.0%)  | 63 (87.5%)  | 89 (78.8%)  | 60 (84.5%)  | .44      |
| No                                                   | 4 (21.0%)   | 9 (12.5%)   | 24 (21.2%)  | 11 (15.5%)  |          |
| <b>Frequency of Breaks</b>                           |             |             |             |             |          |
| Every ≤55 minute                                     | 4 (26.7%)   | 20 (31.3%)  | 33 (37.1%)  | 23 (38.3%)  | .75      |
| 1 hour +                                             | 11 (73.3%)  | 43 (68.3%)  | 56 (62.9%)  | 37 (61.7%)  |          |
| <b>Servings of Fruit per Day</b>                     |             |             |             |             |          |
|                                                      | 0.97 (0.97) | 1.08 (1.00) | 1.07 (0.93) | 0.98 (0.97) | .58      |
| <b>Servings of Vegetables per Day</b>                |             |             |             |             |          |
|                                                      | 1.70 (1.17) | 2.06 (1.27) | 1.75 (1.19) | 1.78 (1.20) | .42      |

BMI-Body Mass Index

MVPA-Moderate to Vigorous Physical Activity
