# Supplementary material for: Physical Wellness Among Gaming Adults: Cross-Sectional Study
Source: PubMed Central journal article supplement (PMC6019842; doi:10.2196/games.9571), 2018-06-12
Supplement: games_v6i2e12_app3.pdf [file games_v6i2e12_app3.pdf]

Associations of weekday gaming time with obesity, physical activity, and cardiovascular risk factors.

|                                     | Weekday Gaming Time, hours/day |                  |                  |                  | <i>P</i> |
|-------------------------------------|--------------------------------|------------------|------------------|------------------|----------|
|                                     | Q1 (<0.5)                      | Q2 (0.5-1)       | Q3 (>1-<3)       | Q4 (3+)          |          |
| <b><i>N</i> (%)</b>                 | 61 (20.8%)                     | 100 (34.3%)      | 56 (19.2%)       | 75 (25.7%)       |          |
| <b>BMI<sup>a</sup></b>              |                                |                  |                  |                  |          |
| Age-adjusted                        | Reference                      | -0.01            | 0.003            | 0.02             | .58      |
| Multivariable-adjusted <sup>b</sup> | Reference                      | 0.001            | 0.02             | 0.04             | .30      |
| <b>Obese</b>                        |                                |                  |                  |                  |          |
| Age-adjusted                        | 1.00                           | 1.00 (0.53-1.90) | 0.95 (0.45-1.97) | 1.14 (0.57-2.27) | .68      |
| Multivariable-adjusted <sup>b</sup> | 1.00                           | 0.96 (0.47-1.97) | 1.15 (0.51-2.60) | 1.21 (0.55-2.64) | .52      |
| <b>≥2.5 MVPA, hours/week</b>        |                                |                  |                  |                  |          |
| Age-adjusted                        | 1.00                           | 0.64 (0.33-1.23) | 1.00 (0.47-2.14) | 0.56 (0.28-1.14) | .22      |
| Multivariable-adjusted <sup>c</sup> | 1.00                           | 0.67 (0.34-1.37) | 1.12 (0.50-2.53) | 0.65 (0.31-1.40) | .47      |
| <b>Cardiovascular Risk Factors</b>  |                                |                  |                  |                  |          |
| Age-adjusted                        | 1.00                           | 2.12 (0.87-5.17) | 3.04 (1.11-8.32) | 2.21 (0.80-6.09) | .21      |
| Multivariable-adjusted <sup>d</sup> | 1.00                           | 2.27 (0.88-5.90) | 3.23 (1.10-9.53) | 1.97 (0.67-5.83) | .41      |

<sup>a</sup>Log-transformed variable.

<sup>b</sup>Adjusted for age, race, gender, education, income >75,000/year, employment, meeting physical activity recommendations, disability, servings of fruit per day, and servings of vegetables per day.

<sup>c</sup>Adjusted for age, race, gender, education, income >75,000/year, employment, disability, servings of fruit per day, and servings of vegetables per day.

<sup>d</sup>Adjusted for age, race, gender, education, income >75,000/year, employment, meeting physical activity recommendations, servings of fruit per day, and servings of vegetables per day.

BMI-Body Mass Index

MVPA-Moderate to Vigorous Physical Activity
